1 **Title**

2 Loss of PABPC1 is compensated by elevated PABPC4 and correlates with transcriptome  
3 changes

4

5 Jingwei Xie<sup>1</sup>, Xiaoyu Wei<sup>1</sup>, Yu Chen<sup>1</sup>, Kalle Gehring<sup>1,2</sup>

6

7 <sup>1</sup> Department of Biochemistry and *Groupe de recherche axé sur la structure des*  
8 *protéines*, McGill University, Montreal, Quebec H3G 0B1, Canada

9

10 <sup>2</sup> To whom correspondence should be addressed: Dept. of Biochemistry, McGill  
11 University, 3649 Promenade Sir William Osler, Rm. 473, Montreal, QC H3G 0B1,  
12 Canada. Tel.: 514-398-7287; Fax: 514-398-2983; E-mail: [kalle.gehring@mcgill.ca](mailto:kalle.gehring@mcgill.ca).

13

14

15

16 **Abstract**

17 Cytoplasmic poly(A) binding protein (PABP) is an essential translation factor that binds to  
18 the 3' tail of mRNAs to promote translation and regulate mRNA stability. PABPC1 is the  
19 most abundant of several PABP isoforms that exist in mammals. Here, we used the  
20 CRISPR/Cas genome editing system to shift the isoform composition in HEK293 cells.  
21 Disruption of PABPC1 elevated PABPC4 levels. Transcriptome analysis revealed that the  
22 shift in the dominant PABP isoform was correlated with changes in key transcriptional  
23 regulators. This study provides insight into understanding the role of PABP isoforms in  
24 development and differentiation.

25 **Keywords**

26 PABPC1, PABPC4, c-Myc

27

## 28 **1. Introduction**

29 Cytoplasmic poly(A) binding protein (PABP) is a key component of the translational  
30 machinery; it is critical for the closed loop formation of mRNA and stimulates mRNA  
31 translation into protein (Sonenberg and Hinnebusch 2009). PABP plays a direct role in 60S  
32 subunit joining and is integral to the formation of the translation initiation complex on the  
33 mRNA (Kahvejian, Svitkin et al. 2005). PABP also protects mRNA transcripts from decay  
34 (Coller, Gray et al. 1998).

35 Most structural and functional studies of cytoplasmic PABPs are based on PABPC1.  
36 PABPC1 is the most abundant of several cytoplasmic poly(A) binding proteins (PABPs)  
37 found in vertebrates and has been known for four decades (Blobel 1973). PABPC1 consists  
38 of four RNA-binding domains (RRM1-4) followed by a linker region and a conserved C-  
39 terminal MLLE domain. The RRM domains mediate the circularization of mRNA through  
40 the binding of the 3' poly(A) tail and eIF4F complex on the mRNA 5' cap (Imataka, Gradi  
41 et al. 1998, Deo, Bonanno et al. 1999, Kahvejian, Svitkin et al. 2005, Safaee, Kozlov et al.  
42 2012). The linker region may promote the self-association of PABPC1 on mRNA although  
43 the molecular details of the interaction are unknown (Melo, Dhalia et al. 2003, Simon and  
44 Seraphin 2007). The C-terminus of PABPC1 contains a MLLE domain that mediates  
45 binding of a peptide motif, PAM2, found in many PABP-binding proteins (Xie, Kozlov et  
46 al. 2014).

47 Five other less abundant cytoplasmic PABPs exist in higher vertebrate. The PABP isoforms  
48 are believe to fulfill functionally distinct roles in vertebrate development (Gorgoni,  
49 Richardson et al. 2011). PABPC3 (tPABP or PABPC2 in mouse) is testis-specific (Kleene,  
50 Mulligan et al. 1998). PABPC4 (iPABP) is inducible in activated T cells (Yang, Duckett  
51 et al. 1995) and serves a critical role in erythroid differentiation (Kini, Kong et al. 2014).  
52 PABPC1L (ePABP) functions in oocytes and early embryos (Voeltz, Ongkasuwan et al.  
53 2001, Seli, Lalioti et al. 2005, Guzeloglu-Kayisli, Pauli et al. 2008). PABPC1L is  
54 substituted by PABPC1 later in development, but remains expressed in ovaries and testes  
55 of adult (Vasudevan, Seli et al. 2006). PABPC4L and PABPC5 (Blanco, Sargent et al.  
56 2001) lack the linker and MLLE domain.

57 There are additional binding sites for PABPC1 on mRNA transcripts in addition to the 3'  
58 poly(A) tail. Gel shift assays show that the RRM domains of PABPC1 bind various RNA  
59 sequences other than poly(A); the RRM3-4 domains have broader specificity than RRM1-  
60 2 (Sladic, Lagnado et al. 2004). It was shown by CLIP-seq that only a low percentage  
61 (2.6%) of sequencing reads are pure poly(A) (Kini, Silverman et al. 2016). PABPC1 binds  
62 to an auto-regulatory sequence in the 5'-UTR of its own mRNA, and controls its own  
63 translation (de Melo Neto, Standart et al. 1995, Wu and Bag 1998, Hornstein, Harel et al.  
64 1999). CLIP-seq study in mouse reveals that PABPC1 binds to a subset of A-rich sequences  
65 in 5'-UTR, besides predominant binding to 3'-UTR of mRNAs (Kini, Silverman et al.  
66 2016). These PABPC1 interactions at 5'-UTR can impact and coordinate post-  
67 transcriptional controls on mRNAs (Kini, Silverman et al. 2016).

68 The functional specificity or redundancy of cytoplasmic PABPs is not well understood yet.  
69 There have been increasing interests in PABPC4 in recent years. PABPC4, a minor isoform  
70 of PABP, was first identified as an inducible protein in activated T-cells (Yang, Duckett et  
71 al. 1995). Depletion of PABPC4 interferes with embryonic development of *Xenopus laevis*,  
72 and cannot be rescued by isoforms PABPC1 or PABPC1L (Gorgoni, Richardson et al.  
73 2011). PABPC4 plays an essential role in erythroid differentiation, and its depletion  
74 inhibits terminal erythroid maturation (Kini, Kong et al. 2014). Motif analyses of PABPC4  
75 affected mRNAs reveal a high-value AU-rich motif in the 3' untranslated regions (UTR)  
76 (Kini, Kong et al. 2014).

77 A major difficulty in studying the roles of PABP isoforms is the abundance of PABPC1  
78 compared with the minor isoforms. To investigate specific or redundant roles of PABP  
79 isoforms, we disrupted PABPC1 in human cells with CRISPR/Cas9 gene editing system.  
80 An elevated level of PABPC4 compensated the loss of PABPC1, which suggested certain  
81 redundancy between the two isoforms. However, the transcriptome profile changed in  
82 PABPC4 elevated cells. Gene set enrichment analysis indicated that c-Myc was the most  
83 common gene in enriched pathways. Further, we showed correlated changes between  
84 PABP isoforms and c-Myc levels. These studies expand our understanding of cytoplasmic  
85 PABPs and suggest importance of a finely tuned network of PABP isoform usage.

## 86 2. Materials and methods

### 87 2.1 Cell culture and plasmids

88 Cells were cultured in DMEM supplemented with antibiotics and 10% fetal bovine serum.  
89  $10^5$  cells per well were plated in 24-well plate the day before transfection. 0.8  $\mu\text{g}$  DNA  
90 plasmid was mixed with 2  $\mu\text{l}$  Lipofectamine 2000 in Opti-MEM and then added to cells.  
91 After 24 h, cells were trypsin digested and split onto cover slides. pFRT/TO/FLAG/HA-  
92 DEST PABPC4 was from Thomas Tuschl (Addgene plasmid #19882) (Landthaler,  
93 Gaidatzis et al. 2008). DNA fragment expressing PABPC1 (NM\_002568) or  
94 PABPC1 $\Delta$ MLLE (1-542) were cloned into pCDNA3-EGFP between BamH I and Not I.

### 95 2.2 CRISPR/Cas9 genome editing

96 Target sequences were identified in PABPC1 using CasFinder  
97 (<http://arep.med.harvard.edu/CasFinder/>) (Mali, Yang et al. 2013). hCas9 was from George  
98 Church (Addgene plasmid #41815). gBlocks expressing gRNA and the target sites were  
99 synthesized at Integrated DNA Technologies. The synthesized gBlocks were PCR  
100 amplified with primers gRNAforward/reverse for transfection into cells.  $0.1 \times 10^6$   
101 HEK293T cells were transfected with 1  $\mu\text{g}$  Cas9 plasmid, 1  $\mu\text{g}$  gRNA, and 0.5  $\mu\text{g}$  linearized  
102 NeoR gene fragment, using Lipofectamine 2000 as per the manufacturer's protocols. Cells  
103 were split after 24 h, and selected in 400  $\mu\text{g}/\text{mL}$  G418. Single cell-derived colonies were  
104 screened by western blotting for PABPC1 null mutations.

105

### 106 2.3 Primer and siRNA sequences

| Primer/siRNA | Sequence/catalog #    |
|--------------|-----------------------|
| siPABPC1     | AAGGUGGUUUGUGAUGAAAAU |
| siPABPC4-1   | GCUUUGGCUUUGUGAGUUA   |
| siPABPC4-2   | GGUAAGACCCUAAGUGUCA   |
| siControl    | Qiagen (SI03650318)   |

---

|                |                                         |
|----------------|-----------------------------------------|
| gRNAForward    | TGTACAAAAAAGCAGGCTTTAAAGGAACCA          |
| gRNAReverse    | TAATGCCAACTTTGTACAAGAAAGCTGGGT          |
| Pabpc1_C_termR | AACACCGGTGGCACTGTAACTGC                 |
| Pabpc1_midF:   | ACTCCTGCTGTCCGCACCGTTCCA                |
| Pabpc1_3UTRR   | ATCAATTCTGTTACTTAAAACAGAA               |
| Pabpc1_MLLER   | GTTAACTGCTTTCTGGGCAGCCTCT               |
| Pabpc1_L10     | TCACCCAAGAAATGTGATTTTTATTAAGAAATCATTAAA |
| (genome)       | TCCATACCTGTTGCATTGTAA                   |
| Pabpc1_U9      | GCAAACCTCAGATCGAAGAAGACAGCATAAACACTTTT  |
| (genome)       | CACTCAGTAAGTTTTCCCAGTT                  |

---

107

## 108 **2.4 Genomic DNA extraction**

109 Cells were pelleted and resuspended in 3 mL of TE buffer and 100  $\mu$ L of 20% SDS. 20  $\mu$ L  
110 of Proteinase K 20 mg/mL stock solution was added to mix gently by inversion and  
111 incubate overnight at 55 °C. 1 mL of saturated NaCl solution was added to the mixture.  
112 The solution was then precipitated overnight in 10 mL 100% EtOH (room temperature).  
113 DNA was transferred to 5 mL of 70% EtOH, and incubated overnight on rocker. DNA was  
114 then moved to a new Eppendorf tube and left air-dry. The DNA was dissolved in water and  
115 stored at -20 °C.

116

## 117 **2.5 RNA extraction and cDNA library preparation**

118 Total RNA was extracted from confluent 10-cm dishes using Trizol (Thermo-Fisher  
119 15596-026) as per manufacturer's instructions. RNA was air-dried and dissolved in  
120 distilled water. Dissolved RNA was further purified using Qiagen miRNeasy micro kit (Cat  
121 #217084). RNA from replicates of HEK293 or clone-c1c4 cells were aliquoted and stored  
122 at -80 °C for later quantitative RT-PCR analysis or sent for mRNAseq library preparation  
123 at Genome Quebec Innovation Center.

124

## 125 **2.6 RNA-seq and Differential gene expression analysis**

126 Pair-ended RNA sequencing with read lengths of 100 bases was performed at the Genome  
127 Quebec Innovation Center using the Illumina Hiseq 2000 sequencer. Reads were trimmed

128 from the 3' end to have a phred score of at least 30. Illumina sequencing adapters were  
129 removed from the reads, and all reads were required to have a length of at least 32.  
130 Trimming and clipping were done with Trimmomatic  
131 (<http://www.usadellab.org/cms/index.php?page=trimmomatic>). The filtered reads were  
132 aligned to reference genome b37. The alignment was done with the combination of  
133 tophat/bowtie software to generate a Binary Alignment Map file (Trapnell, Pachter et al.  
134 2009). Read counts were obtained using HTSeq as input. The differential gene expression  
135 analysis was done using DESeq (Anders and Huber 2010) and edgeR (Robinson, McCarthy  
136 et al. 2010) Bioconductor package. The results of the differential transcript expression  
137 analysis were generated using cuffdiff. FPKM values calculated by cufflinks were used as  
138 input (Trapnell, Roberts et al. 2012).

139

## 140 **2.7 Preranked gene set enrichment analysis**

141 Differential genes from Deseq were ranked by their fold of changes (FC) and p-values  
142 (Ranking score =  $\log_2FC \times (-\log_{10}(p\text{-value}))$ ) (Supplemental Table 3) (Plaisier, Taschereau  
143 et al. 2010). The ranked gene list was used as input for GSEA and leading edge analysis  
144 (Mootha, Lindgren et al. 2003, Subramanian, Tamayo et al. 2005). The detailed GSEA  
145 parameters were as follows: the number of permutations is 1000, and the permutation type  
146 was configured to the gene set.

147

## 148 **2.8 Immunofluorescence and confocal microscopy**

149 Cells were fixed with 4% PFA in PBS, and penetrated by cold methanol (-20 °C) or 0.1%  
150 Triton X-100 in PBS for 10 min. Cells were blocked with 5% goat serum (Millipore S26)  
151 in PBS for 1 h. Then cells were incubated in PBS, supplemented with anti-PABPC1 (Santa  
152 Cruz sc32318, 1:200) and anti-PABPC4 (PTGlab AP-14960, 1:200). Cells were washed in  
153 PBS three times, before incubation with second antibodies conjugated with Alexa488 or  
154 Alexa647 (Sigma-Aldrich A31620, A31628, A31571) at 1:200 – 1:500 dilutions. DAPI  
155 (Roche) was added to the first wash at 0.5 µg/ml for 10 min. Cover slides were mounted in  
156 ProLong Gold anti-fade reagent (Life Technology P36930). Images were collected on a  
157 Zeiss LSM 310 confocal microscope in the McGill University Life Sciences Complex  
158 Advanced BioImaging Facility (ABIF).

159

## 160 **2.9 Quantitative RT-PCR**

161 Total RNA was extracted from cells with Trizol (Life Technology). cDNA libraries were  
162 prepared using SuperScript First-Strand Synthesis System for RT-PCR (Life Technology).  
163 Validated Taqman assays were purchased for quantification of GAPDH (Applied  
164 Biosystems Hs 02758991), c-Myc (Applied Biosystems Hs00153408), and 18sRNA  
165 (Applied Biosystems Hs 99999901). qRT-PCR were run and analyzed in Stepone Plus PCR  
166 system (Applied Biosystems).

167

## 168 **2.10 Western blotting**

169 Protein samples were heated at 95°C and separated by SDS-PAGE. Proteins were then  
170 transferred to PVDF membrane (Millipore) in Tris/Glycine buffer with 20% methanol in  
171 cold room. PVDF membrane was blocked in TBST (pH 7.5), containing 0.05% Tween-20  
172 and 5% skim milk powder or bovine serum albumin. The membrane was then incubated  
173 with primary antibodies, including anti-PABPC1 (Abcam ab21060, Cell signaling 4992 or  
174 Santa Cruz sc32318 1:1000), anti-PABPC4 (Abcam ab76763), anti-c-Myc (Santa Cruz sc  
175 40), anti-tubulin (Sigma-Aldrich T9028 1:5000) and anti-GFP (Clontech 632381 1:2000).  
176 The membrane was then washed three times in TBST and incubated with goat-anti-rabbit  
177 (Jackson ImmunoResearch 111-035-046 1:5000) or goat-anti-mouse (Jackson  
178 ImmunoResearch 115-035-071 1:5000) for 0.5 h, washed again, developed with  
179 Amersham ECL prime kit (GE healthcare RPN2236), and imaged on an Alpha Innotech  
180 imaging system.

181

## 182 **3. Results**

### 183 **3.1 PABPC4 compensates partial loss of PABPC1 in HEK293**

184 PABPC1 is the predominant isoform of cytoplasmic PABP in cells. We chose to edit  
185 endogenous PABPC1 to check for changes in expression of other isoforms. We selected  
186 two target sites in exon 10 of the *Pabpc1* locus, and incorporated the sequences into  
187 gBlocks expressing guide RNA scaffolds (Fig. S1). The two scaffold RNAs were  
188 separately transfected into HEK293, together with Cas9 plasmid and a linearized NeoR  
189 gene for antibiotic selection. Random deletion, insertion or mutation was introduced

190 around the targeted sites. Single cell colonies were screened with an antibody recognizing  
191 the C-terminal of PABPC1, for mutant cell-lines expressing PABPC1 mutants altered after  
192 the target sites. About 20% of the colonies had insertion or deletions leading to a shortened  
193 or disrupted PABPC1 (Fig. 1A). Two typical cell-lines, clone-c1 expressing an exon-  
194 skipped PABPC1 (Fig. 2 and Fig. S2), and clone-c1c4 (from target sequence 2) expressing  
195 a truncated PABPC1 (Fig. 1A&D) were selected for genomic DNA sequencing (Fig. 1C).  
196 Deletion of 3 base pairs in clone-c1 resulted in skipping of the whole exon 10 (Fig. S2).  
197 The 2 base pair insertion in clone-c1c4, led to truncated *Pabpc1* mRNA (Fig. 1D) and a  
198 corresponding PABPC1 protein truncates due to early termination after the two base pair  
199 insertion (Fig. 1B and Fig. 2). Clone-c1c4 was selected for further study, as its PABPC1  
200 protein was totally disrupted and greatly decreased. An approximate two-fold elevation of  
201 PABPC4 in protein and mRNA levels was observed in clone-c1c4, where the PABPC1 is  
202 truncated and decreased (Fig. 1A & E). The major PABP isoform in clone-c1c4 is  
203 PABPC4, instead of PABPC1 as in HEK293.

204

### 205 **3.2 Overexpression of PABPC1 represses elevated PABPC4 in clone-c1c4 cells**

206 The shift of dominative PABP isoform from PABPC1 to PABPC4 did not change cell  
207 proliferation (data not shown) or morphology (Fig. 6B). This suggests that the two isoforms  
208 are redundant in maintaining basic cellular activities. We then asked whether the elevated  
209 PABPC4 in clone-c1c4 was reversible by expression of PABPC1. Clone-c1c4 cells were  
210 overexpressed with PABPC1 or PABPC1 $\Delta$ MLLE (Fig. 3A). PABPC1 $\Delta$ MLLE  
211 overexpression repressed PABPC4 more in clone-c1c4 cells. It is not clear why deletion of  
212 the MLLE domain enhances the repression activity of PABPC1. However, it indicates that  
213 the repression comes from the RNA binding ability of the RRM domains.

214

### 215 **3.3 Overexpression of PABPC4 represses endogenous PABPC1 in HEK 293**

216 We next overexpressed PABPC4 in HEK293, and found a reduction of endogenous  
217 PABPC1 (Fig. 3B). This further confirms the redundancy of isoforms PABPC1 and  
218 PABPC4. The total amount of PABP isoforms may be well regulated for cellular  
219 operations. Thus the elevation of PABPC4 in clone-c1c4 cells is due to loss of PABPC1.

220



### 221 **3.4 Differential gene expression analysis in clone-c1c4 cells**

222 The clone-c1c4 cell-line offered us a platform to study PABP isoform specific functions.  
223 To investigate the effects of PABP isoform usage shift on the transcriptome, we submitted  
224 clone-c1c4 and HEK293 cells for RNA-seq. Read counts were obtained using HTSeq.  
225 Differential gene expression analysis was done with edgeR (Robinson, McCarthy et al.  
226 2010) and DESeq (Anders and Huber 2010) R bioconductor packages. Differential  
227 expressed (DE) genes were ranked according to the p-values. The gene expression heat  
228 map (Fig. S3) indicated profile changes in clone-c1c4 cells. The top 300 DE genes were  
229 labeled red on MA plot (Fig. 4A). Most of the top 300 DE genes were relatively highly  
230 expressed according to the counts. The top ten DE genes were shown in table (Fig. 4B).  
231 Representative wiggle track views of the ten genes displayed mRNA profiles, confirming  
232 the DE gene calling (Fig. 4C).

233

### 234 **3.5 c-Myc is central to differential gene expression in clone-c1c4**

235 To infer biologically important genes underlying the transcriptome changes, we used Gene  
236 Set Enrichment Analysis to examine the enrichment of 50 hallmark signature gene sets  
237 (Liberzon, Birger et al. 2015). Enriched gene sets were plotted against their normalized  
238 enrichment scores. Gene sets with p-values lower than 0.10 are marked red (Fig. 5A). The  
239 leading edge subset analysis of the most enriched gene sets revealed c-Myc as the most  
240 overlapped gene (Fig. 5B and Fig. S4). The increase of c-Myc in clone-c1c4 was confirmed  
241 by western blotting and qRT-PCR (Fig. 5 C & D).

242

### 243 **3.6 c-Myc mRNA half life is not changed in clone-c1c4**

244 To check whether the increased c-Myc mRNA level in clone-c1c4 was transcriptional or  
245 post-transcriptional, we treated HEK293 or clone-c1c4 cells with 10 µg/mL actinomycin-  
246 D to inhibit new transcription. Samples were collected at different time points to determine  
247 c-Myc mRNA half-life by quantitative RT-PCR. C-Myc mRNA levels measured by  
248 taqman assay were normalized to 18s RNA (Fig. 6A). This suggests that the increase of c-  
249 Myc mRNA level is transcriptional.

250

### 251 **3.7 PABPC4 is predominantly cytoplasmic in clone-c1c4**

252 Although role of PABPC4 in transcriptional control is not known, there is increased nuclear  
253 distribution of PABPC4 in response to stress (Burgess, Richardson et al. 2011) or PABPN1  
254 depletion (Bhattacharjee and Bag 2012). We stained PABPC4 in HEK293 and clone-c1c4  
255 cells, and found PABPC4 are predominantly cytoplasmic in both cell-lines (Fig. 6B). Thus  
256 the increased PABPC4 in clone-c1c4 doesn't lead to significant nuclear relocation.

257

### 258 **3.8 Correlation of PABPC4 and c-Myc changes**

259 We then knocked-down *Pabpc4* expression in clone-c1c4 cells with siRNAs. c-Myc  
260 mRNA and protein levels decreased correlated to PABPC4 depletion (Fig. 7A & B). We  
261 asked whether substitution of PABPC1 by PABPC4 led to the c-Myc increase.  
262 Overexpression of PABPC1-GFP in clone-c1c4 repressed endogenous PABPC4 protein  
263 (Fig. 3A). However, the increased PABPC1-GFP in clone-c1c4 did not decrease the c-  
264 Myc mRNA level. We reasoned that it might take longer for the PABPC1 to indirectly  
265 affect the c-Myc mRNA level, or the relatively large GFP tag might interfere with certain  
266 PABPC1 functions. Nonetheless, the relative usage of PABPC4 isoform correlates with the  
267 c-Myc level and can potentially affect the transcriptome.

268

### 269 **3.9 Isoform usage of PABP and c-Myc levels**

270 To test the effects of PABP isoform usage on c-Myc levels, we depleted PABPC1 or  
271 PABPC4 with siRNAs in HEK293 cells (Fig. 8A). Depletions of the two isoforms affect  
272 c-Myc mRNA levels in opposite directions. Decrease of PABPC4 lowered c-Myc mRNA,  
273 while decrease of PABPC1 raised c-Myc mRNA level. This confirms that the usage of the  
274 PABPC1 or PABPC4 isoform can influence the transcriptome through c-Myc.

275

276 **4. Discussion**

277 Here, we reported compensation of PABPC4 for the partial loss of PABPC1 in HEK293  
278 cells. The cells are viable suggesting a functional overlap of the two isoforms. Analysis of  
279 the transcriptome profile revealed differential gene expression correlated with usage of  
280 PABPC4 and PABPC1. The study helps us understand isoform specific functions of PABP  
281 in development or different tissues.

282

283 Recent genomic studies support PABPC1 recognition of RNA sequences other than pure  
284 poly(A) in mouse (Kini, Silverman et al. 2016) and yeast (Baejen, Torkler et al. 2014). The  
285 overall structures of RRM domains in PABP isoforms are likely to be similar, due to high  
286 sequence similarities between domains. However, conserved differences are found in  
287 PABP isoforms across species. Some of the differences are located at interfaces critical for  
288 RNA recognition, especially in the RRM3-4 domains (Fig. S5). These differences do not  
289 alter the overall structure of the RRM domains, but may contribute to specificity in RNA  
290 recognition. There is a growing realization that PABP isoforms are functionally different  
291 in vertebrate development (Gorgoni, Richardson et al. 2011) and other contexts. PABPC4  
292 depletion impacts steady-state expression of a subset of mRNAs and affects erythroid  
293 differentiation (Kini, Kong et al. 2014). PABPC1L (ePABP) regulates translation and  
294 stability of maternal mRNAs (Vasudevan, Seli et al. 2006), and is substituted by PABPC1  
295 after onset of zygotic transcription (Cosson, Couturier et al. 2002).

296

297 The recently developed *crosslinking immunoprecipitation coupled high-throughput*  
298 *sequencing* technique (CLIP-seq) provides a powerful tool to map association of RNA-  
299 binding proteins with RNA. Mapping the interactions of PABP isoforms with mRNA  
300 would greatly facilitate understanding of the functions of those isoforms. It is likely that  
301 PABP isoforms function through recognition of separate subsets of mRNAs, besides  
302 binding to a common mRNA pool. So far, such mapping data is only available for PABPC1  
303 in higher eukaryotes (Kini, Silverman et al. 2016). The lack of CLIP data from other PABP  
304 isoforms makes biological inferences of differential gene expression profiles difficult.

305

306 In this study, we identified c-Myc as a central player in remodeling the transcriptome of  
307 clone-c1c4 cells. C-Myc is a transcription factor that can shape the cellular transcriptome  
308 (Kress, Sabo et al. 2015). PABP isoforms may act through a subset of mRNAs to indirectly  
309 upregulate c-Myc transcription. In the Gene Set Enrichment Analysis, WNT pathway is  
310 enriched (Fig. 5) and can induce c-Myc transcription (Kress, Sabo et al. 2015). Mechanisms  
311 underlying correlation of PABPC4 and c-Myc remain to be revealed by further studies.

312

313 The significant increase (10-fold) of c-Myc mRNA is tolerated in clone-c1c4. Cell cycle  
314 analysis by propidium iodide DNA staining and flow cytometry showed similar  
315 distribution in HEK293 and clone-c1c4 cells in different phases of the cell cycle (data not  
316 shown). This may be because the increase in c-Myc protein levels were smaller,  
317 approximately three-fold. Elevation of genes like Axin1 (Supplemental Table 1) may  
318 enhance c-Myc protein turnover (Arnold, Zhang et al. 2009), which balances the sharp  
319 increase of c-Myc mRNA. Nonetheless, c-Myc targets are upregulated in clone-c1c4  
320 extensively (Fig. 5B, Supplemental Tables 3 & 4 GSEA sets). Variant calling on the RNA-  
321 seq data reveals no insertion, deletion or mutation in c-Myc, or genes we know to affect c-  
322 Myc transcription. Blast search returns no other genomic sequence for the first 13 base  
323 pairs of the target sequence 2 (Fig. S1), which was used for generation of clone-c1c4.  
324 Modulation of PABPC4 or PABPC1 levels support a correlation of PABPC4 and c-Myc  
325 levels (Fig. 7&8). One interesting observation is that PABPC4 overexpression in HEK293  
326 decreased endogenous PABPC1 by ~50% (Fig. 3B), but did not affect the level of c-Myc  
327 mRNA (data not shown). This may reflect the dominant role PABPC1 compared to other  
328 PABP isoforms. Other isoforms can only function significantly when PABPC1 is at very  
329 low levels, as in clone-c1c4 (Fig. 7A) or PABPC1 depleted HEK293 (Fig. 8A).

330 In summary, we created a human cell-line where the predominant PABPC1 is stably  
331 substituted by PABPC4. This opens a window to observe functional differences between  
332 the two isoforms. Validations and further investigations in different approaches will help  
333 us understand the mechanistic details of PABP regulation.

334 **Acknowledgements**

335 We thank Dr. Guennadi Kozlov for critical comments. We are grateful for suggestions and  
336 discussion from colleagues during the project.

337

338 **Competing interests**

339 No competing interests declared.

340

341 **Author contributions**

342 J.X. designed and carried out the experiments. X.W. and Y.C. assisted J.X. with  
343 experiments. J.X. did the bioinformatics analysis and wrote the manuscript. K.G. revised  
344 the manuscript.

345

346 **Funding**

347 This study was supported by Canadian Institutes of Health Research grant MOP-14219. J.  
348 X. was supported by awards from the CIHR Strategic Training Initiative in Chemical  
349 Biology, the CIHR Strategic Training Initiative in Systems Biology, the Quebec Network  
350 for Research on Protein Function, Engineering, and Applications (PROTEO), and the  
351 *Groupe de recherche axé sur la structure des protéines* (GRASP).

352

353

354

355

356

357 **Figure legends**

358

359 Figure 1. PABPC1 disruption in HEK293 cells by CRISPR/Cas9 based genome editing is  
360 compensated by elevated PABPC4. (A) CRISPR/Cas9 genome editing of PABPC1  
361 generated multiple mutations. Antibody recognizing C-terminal MLLE domain of  
362 PABPC1 (PABPC1 C-domain, Santa Cruz 32318) labels null mutations of PABPC1.  
363 PABPs N-domain antibody (New England Biolabs 4992), which recognizes multiple  
364 cytoplasmic PABP, reveals PABP isoform distribution. Tubulin is stained as a loading  
365 control. Anti-PABPC4 shows an elevated level of PABPC4 protein in clone-c1c4, when  
366 PABPC1 is truncated to about 40 kD and less expressed. Percentages are relative protein  
367 levels after normalized to tubulin. (B) PABPC1 was knocked-down by siRNA, in 293,  
368 clone-c1, or clone-c1c4 cells. The decreased lower bands in clone-c1 and clone-c1c4 were  
369 PABPC1 mutations. Sequences of siRNAs used are listed in materials section. (C)  
370 Genomic DNA sequences at *Pabpc1* gene loci of 293, clone-c1, and clone-c1c4. Deletion  
371 of three base pairs in clone-c1 leads to skipping of exon 10 in mRNA (Fig. S2) and a shorter  
372 PABPC1 protein (Fig. 2). Clone-c1c4 has a two base pair insertion, which results in  
373 significant reduction of mRNA reads after the targeted region (D). Genomic DNA was  
374 extracted and amplified with gene specific primers. PCR products were gel purified and  
375 cloned into PCR2.1 vector for sequencing. Only one sequence was read in multiple clones,  
376 indicating the homogeneity of cell-lines. (D & E) Wiggle tracks showing representative  
377 read alignment of *Pabpc1* or *Pabpc4* genes in HEK293 or clone-c1c4 cells. Track files  
378 were generated from the aligned reads using BedGraphToBigWig.

379

380 Figure 2. Description of PABPC1 protein in HEK293, clone-c1, and clone-c1c4. Wild-type  
381 PABPC1 is 68 kD in molecular weight. A shortened form of PABPC1 was generated in  
382 clone-c1 with residues 447-483 deleted. The mRNA sequence of clone-c1 is shown in  
383 Figure S2. In clone-c1c4, the major PABPC1 was about 42 kD in agreement with the size  
384 of the major mRNA species (Fig. 1E).

385

386 Figure 3. Mutual repression of PABPC1 and PABPC4. (A) Over-expression of pCDNA3-  
387 EGFP (Ctrl), pCDNA3-PABPC1-EGFP, or pCDNA3-PABPC1 $\Delta$ MLLE-EGFP in clone-

388 c1c4 cells. Western blotting shows decrease of PABPC4 protein level in clone-c1c4 cells,  
389 due to over expression of PABPC1-EGFP or PABPC1 $\Delta$ MILLE-EGFP. (B) Over-  
390 expression of PABPC4 (construct in materials) in HEK293 reduces endogenous PABPC1  
391 protein.

392

393 Figure 4. Differential gene expression in HEK293 and the modified clone-c1c4 cells. (A)  
394 MA plot of differential expression magnitude (log<sub>2</sub> of fold change (clone-c1c4/HEK293)  
395 versus expression levels (log<sub>2</sub> of counts per million). The red dots are the top 300  
396 differential genes ranked by p-values. (B) The top 10 differential genes. Ensembl gene id,  
397 gene symbol, log<sub>2</sub> (fold of changes), and log<sub>2</sub> (counts per million) are shown in the table.  
398 (C) Representative view of the mRNA profile of the top 10 differential genes. The figure  
399 is generated with Integrative Genomics Viewer.

400

401 Figure 5. Gene expression in clone-c1c4 cells. (A) Gene set enrichment analysis of selected  
402 hallmark gene sets (Subramanian, Tamayo et al. 2005). The size of circles indicates the  
403 number of significant genes. Gene sets with p-values lower than 0.1 are labeled red. (B)  
404 Leading edge overlap for the modified clone-c1c4 cells. The significantly enriched gene  
405 sets from (A) are aligned to indicate common genes. c-Myc is the most significant  
406 overlapped gene. Other overlapped genes are shown in figure S4. The intensity of color  
407 indicates fold of changes in expression. Only a subset of the genes are displayed for  
408 visibility. (C) Increased c-Myc protein in clone-c1c4 cells. The percentage indicates  
409 relative quantifications of c-Myc protein after normalization. Cells were lysed in SDS-  
410 loading buffer and boiled. c-Myc protein level was probed by antibody (Sant Cruz sc-40).  
411 Tubulin is used as loading control. (D) Increased c-Myc mRNA level. Taqman assay  
412 (Applied Biosystems Hs 00153408) reveals an increase of about 10-fold in c-Myc mRNA  
413 in clone-c1c4. GAPDH (Applied Biosystems Hs 02758991) is used as loading control.

414

415 Figure 6. (A) c-Myc mRNA half life is similar in HEK293 and clone-c1c4. Cells were  
416 treated by (10  $\mu$ g/ml) antinomycin-D for indicated time before Trizol extraction of total  
417 RNA. Taqman assays were used to measure c-Myc levels normalized to 18s RNA (Applied  
418 Biosystems Hs 99999901). The c-Myc mRNA levels of cells without treatment are

419 normalized to 100 for comparison. (B) PABPC4 in clone-c1c4 is predominantly  
420 cytoplasmic. HEK293 or clone-c1c4 cells were stained with DPAI, anti-PABPC4 (Abcam  
421 ab76763), and anti-PABPC1 (Abcam ab21060). The PABPC1 antibody recognizes the C-  
422 terminal tail of PABPC1.

423

424 Figure 7. (A) Decrease of c-Myc protein level correlates with depletion of PABPC4.  
425 Representative blots of *Pabpc4* knocked-down clone-c1c4 cells. Corresponding antibodies  
426 were used to probe PABPC1, PABPC4, c-Myc, and tubulin levels. (B) Correlated c-Myc  
427 mRNA decrease after siRNA mediated knock-down of PABPC4.

428

429 Figure 8. Differential effects of PABPC1 or PABPC4 depletion on c-Myc mRNA level in  
430 HEK293 cells. (A) HEK293 cells were transfected with control siRNA, *siPabpc1*, or  
431 *siPabpc4* for 48 hrs. PABPC1 and PABPC4 were probed to examine knock-down effects.  
432 (B) Changes of c-Myc mRNA levels in siRNA treated HEK293 cells. Depletion of  
433 PABPC4 reduces c-Myc mRNA level, while depletion of PABPC1 increases c-Myc  
434 mRNA. Both differences were significant at a p-value of 0.05 in a two-tail t-test for samples  
435 with identical variance.

436

437

438

439

#### 440 **References**

441 Anders, S. and W. Huber (2010). "Differential expression analysis for sequence count  
442 data." Genome Biol **11**(10): R106.

443 Arnold, H. K., X. Zhang, C. J. Daniel, D. Tibbitts, J. Escamilla-Powers, A. Farrell, S.  
444 Tokarz, C. Morgan and R. C. Sears (2009). "The Axin1 scaffold protein promotes  
445 formation of a degradation complex for c-Myc." EMBO J **28**(5): 500-512.

446 Baejen, C., P. Torkler, S. Gressel, K. Essig, J. Soding and P. Cramer (2014).

447 "Transcriptome maps of mRNP biogenesis factors define pre-mRNA recognition."

448 Mol Cell **55**(5): 745-757.



- 449 Bhattacharjee, R. B. and J. Bag (2012). "Depletion of nuclear poly(A) binding protein  
450 PABPN1 produces a compensatory response by cytoplasmic PABP4 and PABP5 in  
451 cultured human cells." PLoS One **7**(12): e53036.
- 452 Blanco, P., C. A. Sargent, C. A. Boucher, G. Howell, M. Ross and N. A. Affara (2001).  
453 "A novel poly(A)-binding protein gene (PABPC5) maps to an X-specific subinterval  
454 in the Xq21.3/Yp11.2 homology block of the human sex chromosomes." Genomics  
455 **74**(1): 1-11.
- 456 Blobel, G. (1973). "A protein of molecular weight 78,000 bound to the polyadenylate  
457 region of eukaryotic messenger RNAs." Proc Natl Acad Sci U S A **70**(3): 924-928.
- 458 Burgess, H. M., W. A. Richardson, R. C. Anderson, C. Salaun, S. V. Graham and N. K.  
459 Gray (2011). "Nuclear relocation of cytoplasmic poly(A)-binding proteins  
460 PABP1 and PABP4 in response to UV irradiation reveals mRNA-dependent export  
461 of metazoan PABPs." J Cell Sci **124**(Pt 19): 3344-3355.
- 462 Coller, J. M., N. K. Gray and M. P. Wickens (1998). "mRNA stabilization by poly(A)  
463 binding protein is independent of poly(A) and requires translation." Genes Dev  
464 **12**(20): 3226-3235.
- 465 Cosson, B., A. Couturier, R. Le Guellec, J. Moreau, S. Chabelskaya, G. Zhouravleva and  
466 M. Philippe (2002). "Characterization of the poly(A) binding proteins expressed  
467 during oogenesis and early development of *Xenopus laevis*." Biol Cell **94**(4-5): 217-  
468 231.
- 469 de Melo Neto, O. P., N. Standart and C. Martins de Sa (1995). "Autoregulation of  
470 poly(A)-binding protein synthesis in vitro." Nucleic Acids Res **23**(12): 2198-2205.
- 471 Deo, R. C., J. B. Bonanno, N. Sonenberg and S. K. Burley (1999). "Recognition of  
472 polyadenylate RNA by the poly(A)-binding protein." Cell **98**(6): 835-845.
- 473 Gorgoni, B., W. A. Richardson, H. M. Burgess, R. C. Anderson, G. S. Wilkie, P. Gautier,  
474 J. P. Martins, M. Brook, M. D. Sheets and N. K. Gray (2011). "Poly(A)-binding  
475 proteins are functionally distinct and have essential roles during vertebrate  
476 development." Proc Natl Acad Sci U S A **108**(19): 7844-7849.
- 477 Guzeloglu-Kayisli, O., S. Pauli, H. Demir, M. D. Lalioti, D. Sakkas and E. Seli (2008).  
478 "Identification and characterization of human embryonic poly(A) binding protein  
479 (EPAB)." Mol Hum Reprod **14**(10): 581-588.

- 480 Hornstein, E., H. Harel, G. Levy and O. Meyuhas (1999). "Overexpression of poly(A)-  
481 binding protein down-regulates the translation or the abundance of its own mRNA."  
482 FEBS Lett **457**(2): 209-213.
- 483 Imataka, H., A. Gradi and N. Sonenberg (1998). "A newly identified N-terminal amino  
484 acid sequence of human eIF4G binds poly(A)-binding protein and functions in  
485 poly(A)-dependent translation." EMBO J **17**(24): 7480-7489.
- 486 Kahvejian, A., Y. V. Svitkin, R. Sukarieh, M. N. M'Boutchou and N. Sonenberg (2005).  
487 "Mammalian poly(A)-binding protein is a eukaryotic translation initiation factor,  
488 which acts via multiple mechanisms." Genes Dev **19**(1): 104-113.
- 489 Kini, H. K., J. Kong and S. A. Liebhaber (2014). "Cytoplasmic poly(A) binding protein  
490 C4 serves a critical role in erythroid differentiation." Mol Cell Biol **34**(7): 1300-  
491 1309.
- 492 Kini, H. K., I. M. Silverman, X. Ji, B. D. Gregory and S. A. Liebhaber (2016).  
493 "Cytoplasmic poly(A) binding protein-1 binds to genomically encoded sequences  
494 within mammalian mRNAs." RNA **22**(1): 61-74.
- 495 Kleene, K. C., E. Mulligan, D. Steiger, K. Donohue and M. A. Mastrangelo (1998). "The  
496 mouse gene encoding the testis-specific isoform of Poly(A) binding protein (Pabp2)  
497 is an expressed retroposon: intimations that gene expression in spermatogenic cells  
498 facilitates the creation of new genes." J Mol Evol **47**(3): 275-281.
- 499 Kress, T. R., A. Sabo and B. Amati (2015). "MYC: connecting selective transcriptional  
500 control to global RNA production." Nat Rev Cancer **15**(10): 593-607.
- 501 Landthaler, M., D. Gaidatzis, A. Rothballer, P. Y. Chen, S. J. Soll, L. Dinic, T. Ojo, M.  
502 Hafner, M. Zavolan and T. Tuschl (2008). "Molecular characterization of human  
503 Argonaute-containing ribonucleoprotein complexes and their bound target mRNAs."  
504 RNA **14**(12): 2580-2596.
- 505 Liberzon, A., C. Birger, H. Thorvaldsdottir, M. Ghandi, J. P. Mesirov and P. Tamayo  
506 (2015). "The Molecular Signatures Database (MSigDB) hallmark gene set  
507 collection." Cell Syst **1**(6): 417-425.
- 508 Mali, P., L. Yang, K. M. Esvelt, J. Aach, M. Guell, J. E. DiCarlo, J. E. Norville and G.  
509 M. Church (2013). "RNA-guided human genome engineering via Cas9." Science  
510 **339**(6121): 823-826.

- 511 Melo, E. O., R. Dhalia, C. Martins de Sa, N. Standart and O. P. de Melo Neto (2003).  
512 "Identification of a C-terminal poly(A)-binding protein (PABP)-PABP interaction  
513 domain: role in cooperative binding to poly (A) and efficient cap distal translational  
514 repression." *J Biol Chem* **278**(47): 46357-46368.
- 515 Mootha, V. K., C. M. Lindgren, K. F. Eriksson, A. Subramanian, S. Sihag, J. Lehar, P.  
516 Puigserver, E. Carlsson, M. Ridderstrale, E. Laurila, N. Houstis, M. J. Daly, N.  
517 Patterson, J. P. Mesirov, T. R. Golub, P. Tamayo, B. Spiegelman, E. S. Lander, J. N.  
518 Hirschhorn, D. Altshuler and L. C. Groop (2003). "PGC-1alpha-responsive genes  
519 involved in oxidative phosphorylation are coordinately downregulated in human  
520 diabetes." *Nat Genet* **34**(3): 267-273.
- 521 Plaisier, S. B., R. Taschereau, J. A. Wong and T. G. Graeber (2010). "Rank-rank  
522 hypergeometric overlap: identification of statistically significant overlap between  
523 gene-expression signatures." *Nucleic Acids Res* **38**(17): e169.
- 524 Robinson, M. D., D. J. McCarthy and G. K. Smyth (2010). "edgeR: a Bioconductor  
525 package for differential expression analysis of digital gene expression data."  
526 *Bioinformatics* **26**(1): 139-140.
- 527 Safaee, N., G. Kozlov, A. M. Noronha, J. Xie, C. J. Wilds and K. Gehring (2012).  
528 "Interdomain allostery promotes assembly of the poly(A) mRNA complex with  
529 PABP and eIF4G." *Mol Cell* **48**(3): 375-386.
- 530 Seli, E., M. D. Lalioti, S. M. Flaherty, D. Sakkas, N. Terzi and J. A. Steitz (2005). "An  
531 embryonic poly(A)-binding protein (ePAB) is expressed in mouse oocytes and early  
532 preimplantation embryos." *Proc Natl Acad Sci U S A* **102**(2): 367-372.
- 533 Simon, E. and B. Seraphin (2007). "A specific role for the C-terminal region of the  
534 Poly(A)-binding protein in mRNA decay." *Nucleic Acids Res* **35**(18): 6017-6028.
- 535 Sladic, R. T., C. A. Lagnado, C. J. Bagley and G. J. Goodall (2004). "Human PABP binds  
536 AU-rich RNA via RNA-binding domains 3 and 4." *Eur J Biochem* **271**(2): 450-457.
- 537 Sonenberg, N. and A. G. Hinnebusch (2009). "Regulation of translation initiation in  
538 eukaryotes: mechanisms and biological targets." *Cell* **136**(4): 731-745.
- 539 Subramanian, A., P. Tamayo, V. K. Mootha, S. Mukherjee, B. L. Ebert, M. A. Gillette,  
540 A. Paulovich, S. L. Pomeroy, T. R. Golub, E. S. Lander and J. P. Mesirov (2005).

541 "Gene set enrichment analysis: a knowledge-based approach for interpreting  
542 genome-wide expression profiles." Proc Natl Acad Sci U S A **102**(43): 15545-15550.  
543 Trapnell, C., L. Pachter and S. L. Salzberg (2009). "TopHat: discovering splice junctions  
544 with RNA-Seq." Bioinformatics **25**(9): 1105-1111.  
545 Trapnell, C., A. Roberts, L. Goff, G. Pertea, D. Kim, D. R. Kelley, H. Pimentel, S. L.  
546 Salzberg, J. L. Rinn and L. Pachter (2012). "Differential gene and transcript  
547 expression analysis of RNA-seq experiments with TopHat and Cufflinks." Nat  
548 Protoc **7**(3): 562-578.  
549 Vasudevan, S., E. Seli and J. A. Steitz (2006). "Metazoan oocyte and early embryo  
550 development program: a progression through translation regulatory cascades." Genes  
551 Dev **20**(2): 138-146.  
552 Voeltz, G. K., J. Ongkasuwan, N. Standart and J. A. Steitz (2001). "A novel embryonic  
553 poly(A) binding protein, ePAB, regulates mRNA deadenylation in *Xenopus* egg  
554 extracts." Genes Dev **15**(6): 774-788.  
555 Wu, J. and J. Bag (1998). "Negative control of the poly(A)-binding protein mRNA  
556 translation is mediated by the adenine-rich region of its 5'-untranslated region." J  
557 Biol Chem **273**(51): 34535-34542.  
558 Xie, J., G. Kozlov and K. Gehring (2014). "The "tale" of poly(A) binding protein: the  
559 MLLE domain and PAM2-containing proteins." Biochim Biophys Acta **1839**(11):  
560 1062-1068.  
561 Yang, H., C. S. Duckett and T. Lindsten (1995). "iPABP, an inducible poly(A)-binding  
562 protein detected in activated human T cells." Mol Cell Biol **15**(12): 6770-6776.  
563

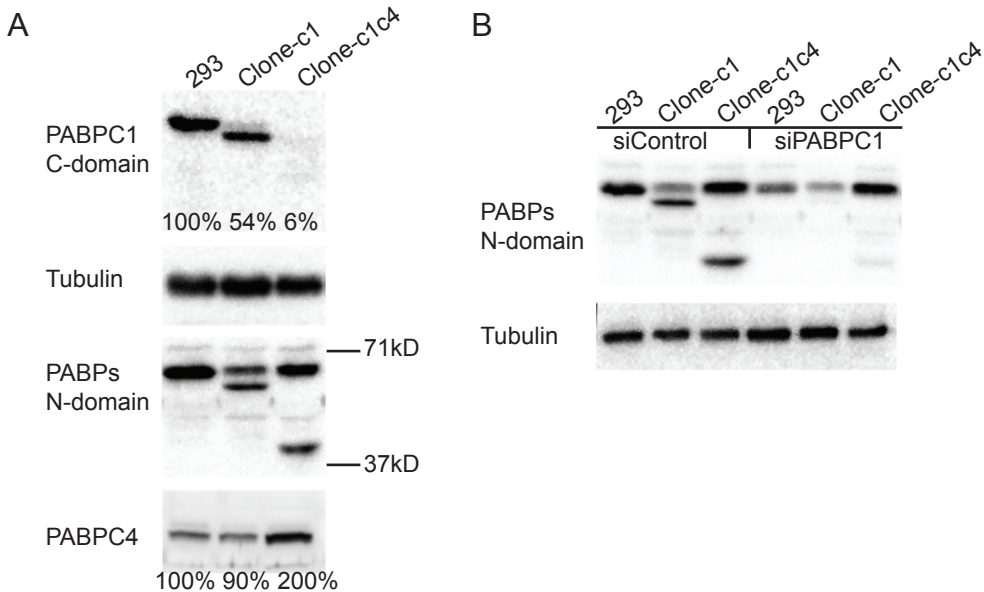

**C**

PABPC1 DNA TTTAAAATGCAGCATTCCAAAA--TATGCCCGGTGCTATCCGCCCAGCTGCT  
PABPC1 mRNA -----CATTCCAAAA--TATGCCCGGTGCTATCCGCCCAGCTGCT  
Clone-c1 DNA TTTAAAATGCAGCATTCCAAAA--TATGCCCGG---TATCCGCCCAGCTGCT  
Clone-c1c4 DNA TTTAAAATGCAGCATTCCAAAA**A**TATGCCCGGTGCTATCCGCCCAGCTGCT

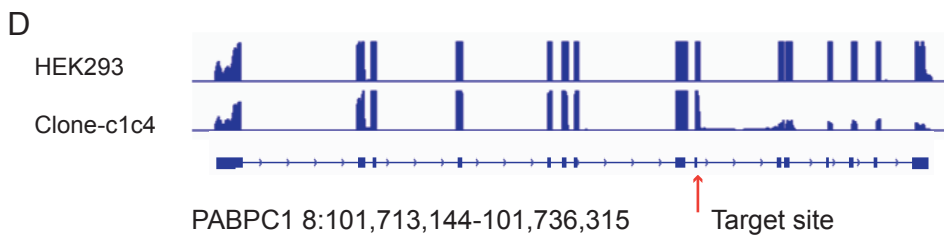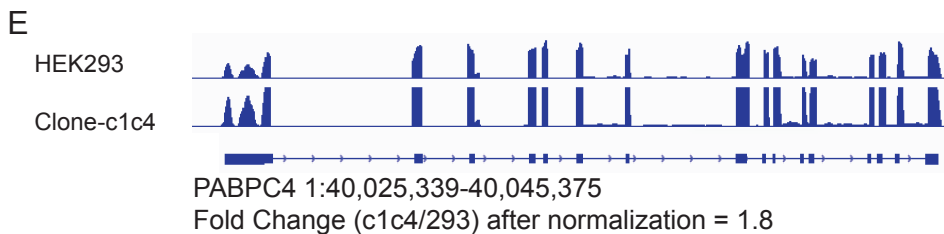

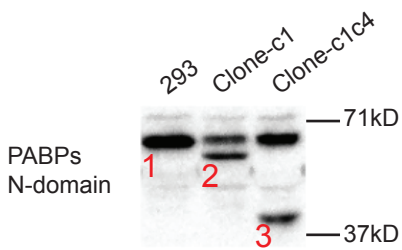

PABPC1

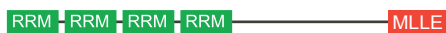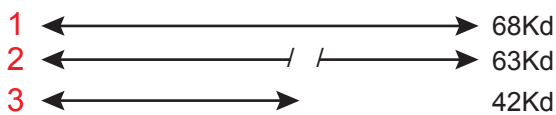

A

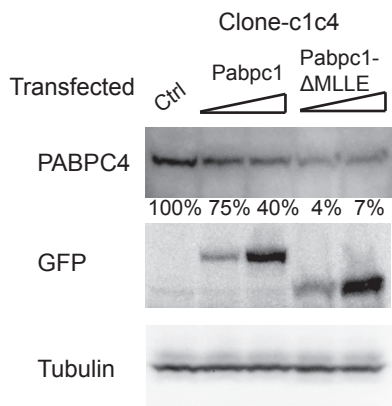

B

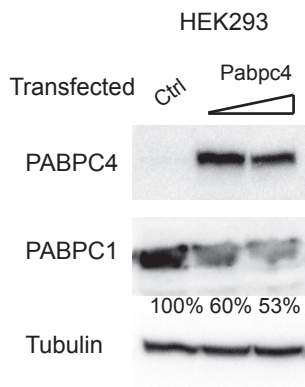

A

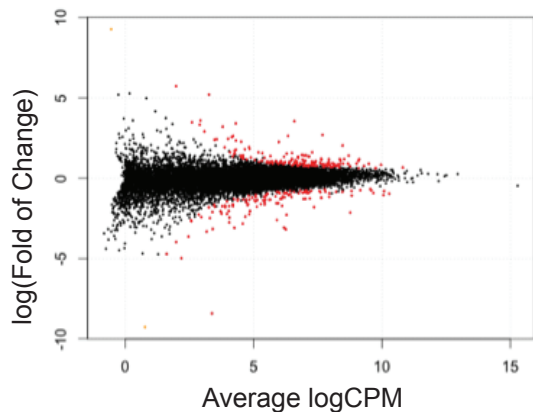

B

|                 | gene_symbol | log_FC | log_CPM |
|-----------------|-------------|--------|---------|
| ENSG00000079215 | SLC1A3      | 2.268  | 5.975   |
| ENSG00000102195 | GPR50       | -8.407 | 3.371   |
| ENSG00000102316 | MAGED2      | -1.774 | 7.347   |
| ENSG00000104419 | NDRG1       | 2.711  | 7.685   |
| ENSG00000115414 | FN1         | -2.113 | 8.757   |
| ENSG00000130508 | PXDN        | -3.052 | 6.177   |
| ENSG00000136997 | MYC         | 3.559  | 6.587   |
| ENSG00000165194 | PCDH19      | -3.157 | 6.248   |
| ENSG00000176887 | SOX11       | 1.631  | 7.282   |
| ENSG00000184613 | NELL2       | 2.652  | 6.333   |

C

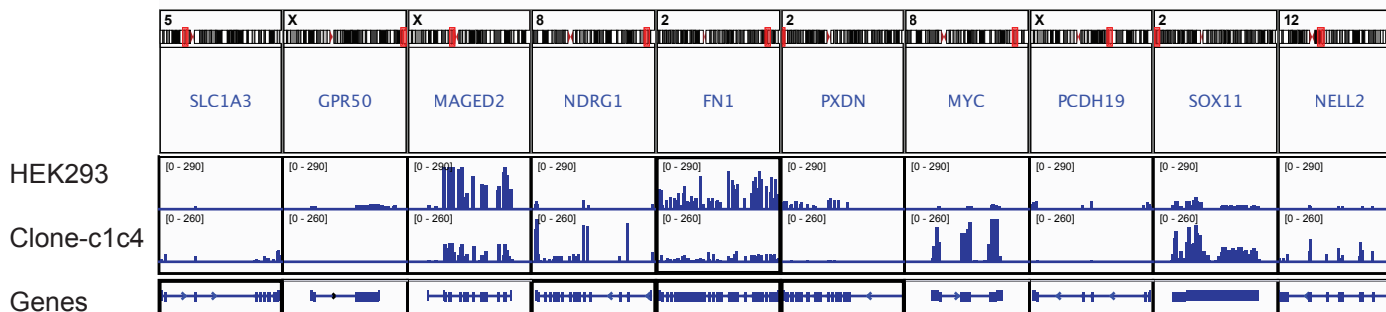



A

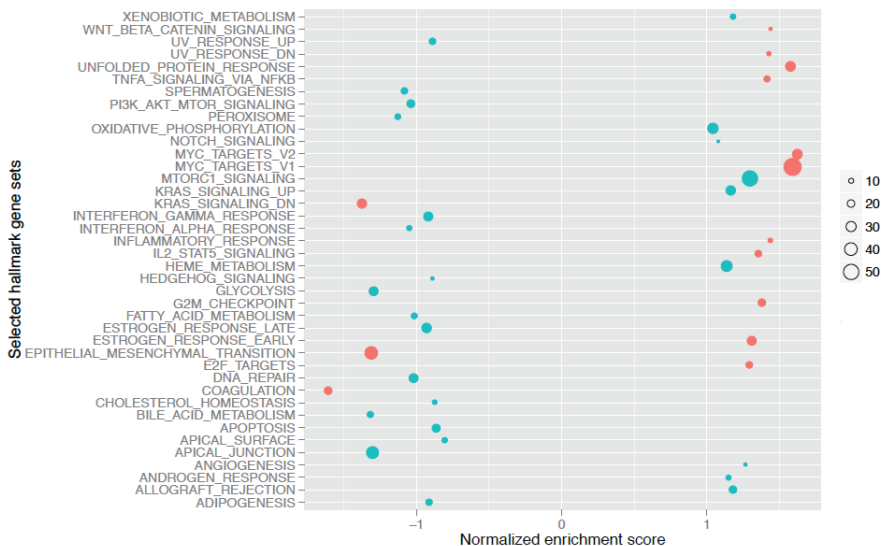

B

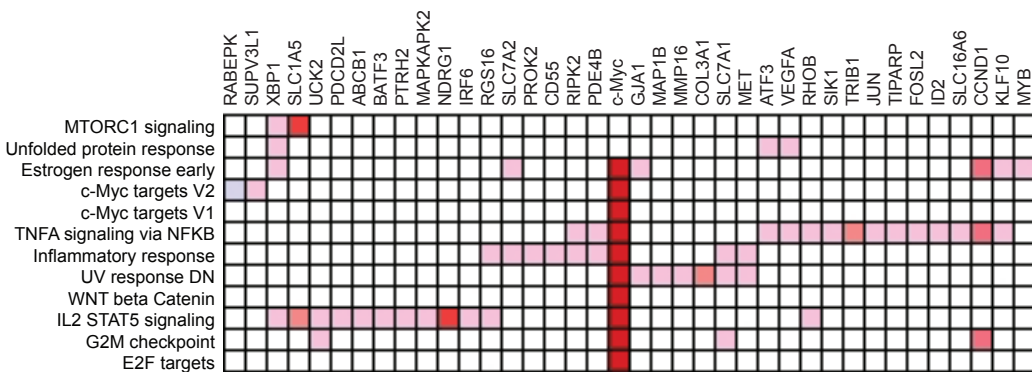

C

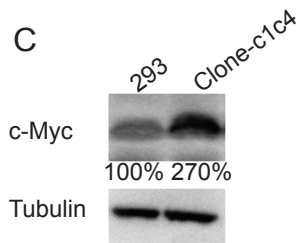

D

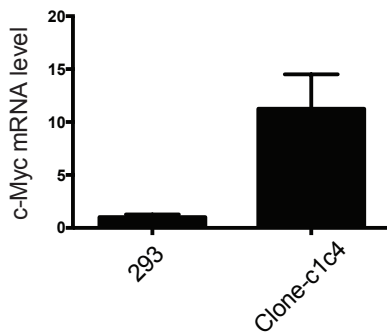

A

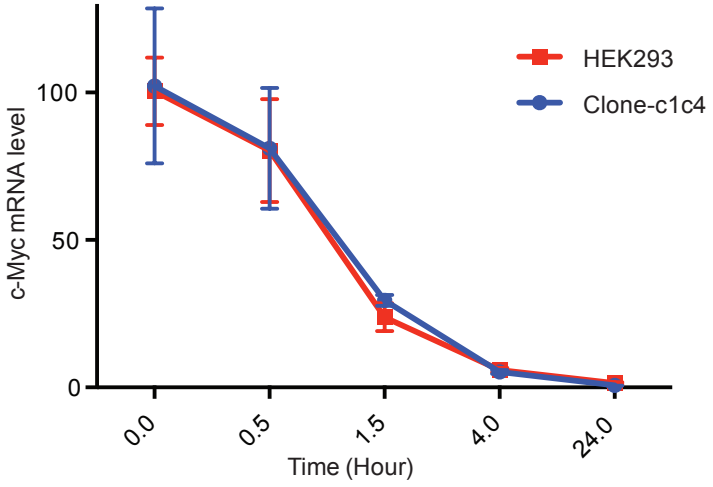

B

HEK293

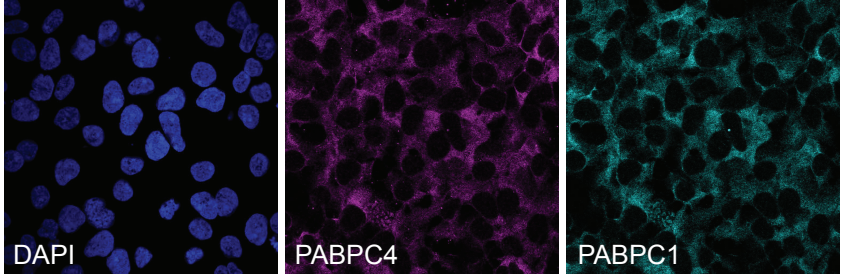

Clone-c1c4

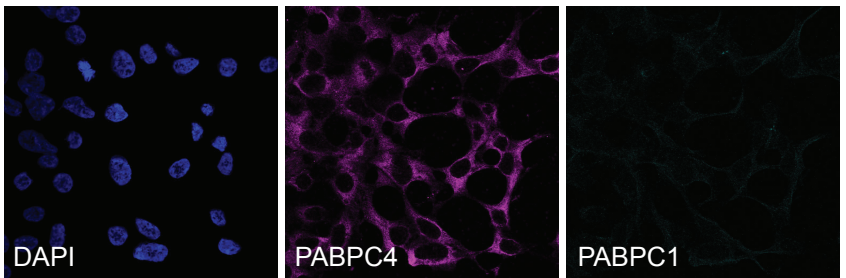

**A**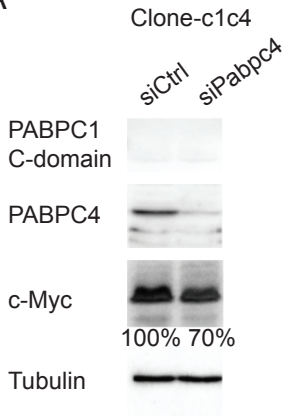**B**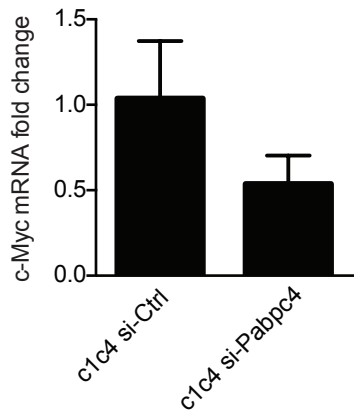

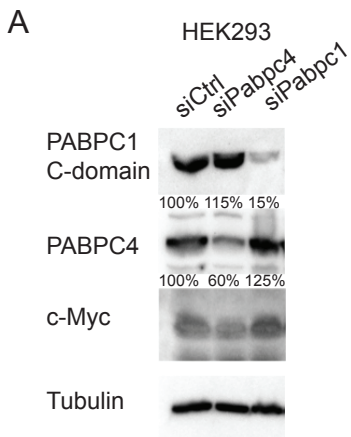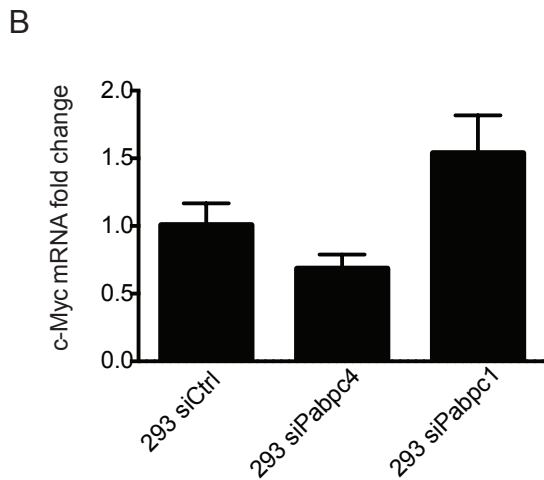

Source: https://biorxiv.org/content/10.1101/2021.02.07.430165v1.full.pdf
